# Supplementary material
Source: publisher figshare collection journal article supplement (https://acs.figshare.com/ndownloader/files/10622410)
Supplement: Supplementary file 1 [file 10622410]

# **Mechanisms of Formaldehyde and C<sub>2</sub> Formation from Methylene Reacting with CO<sub>2</sub> Adsorbed on Ni(110)**

Wei Lin and George C. Schatz\*

Department of Chemistry, Northwestern University, Evanston, Illinois, 60208-3113, USA

Supporting Information

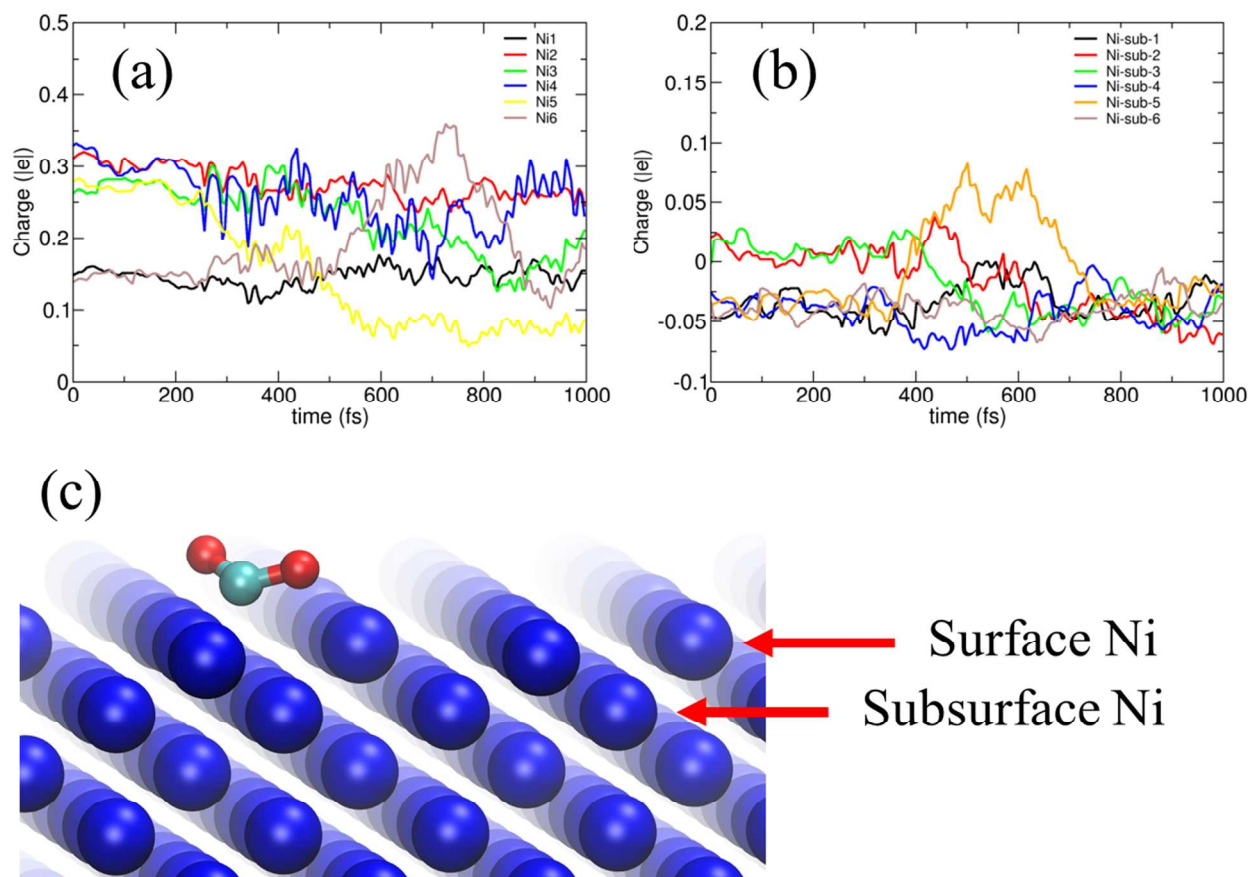

**Figure S1.** Atomic Bader charges of **(a) surface** and **(b) subsurface Ni** for a trajectory which corresponds to the  $\text{CH}_2 + \text{CO}_2^* \rightarrow \text{H}_2\text{CO}^* + \text{CO}^*$  reaction. (c) Definition of the surface and subsurface Ni.

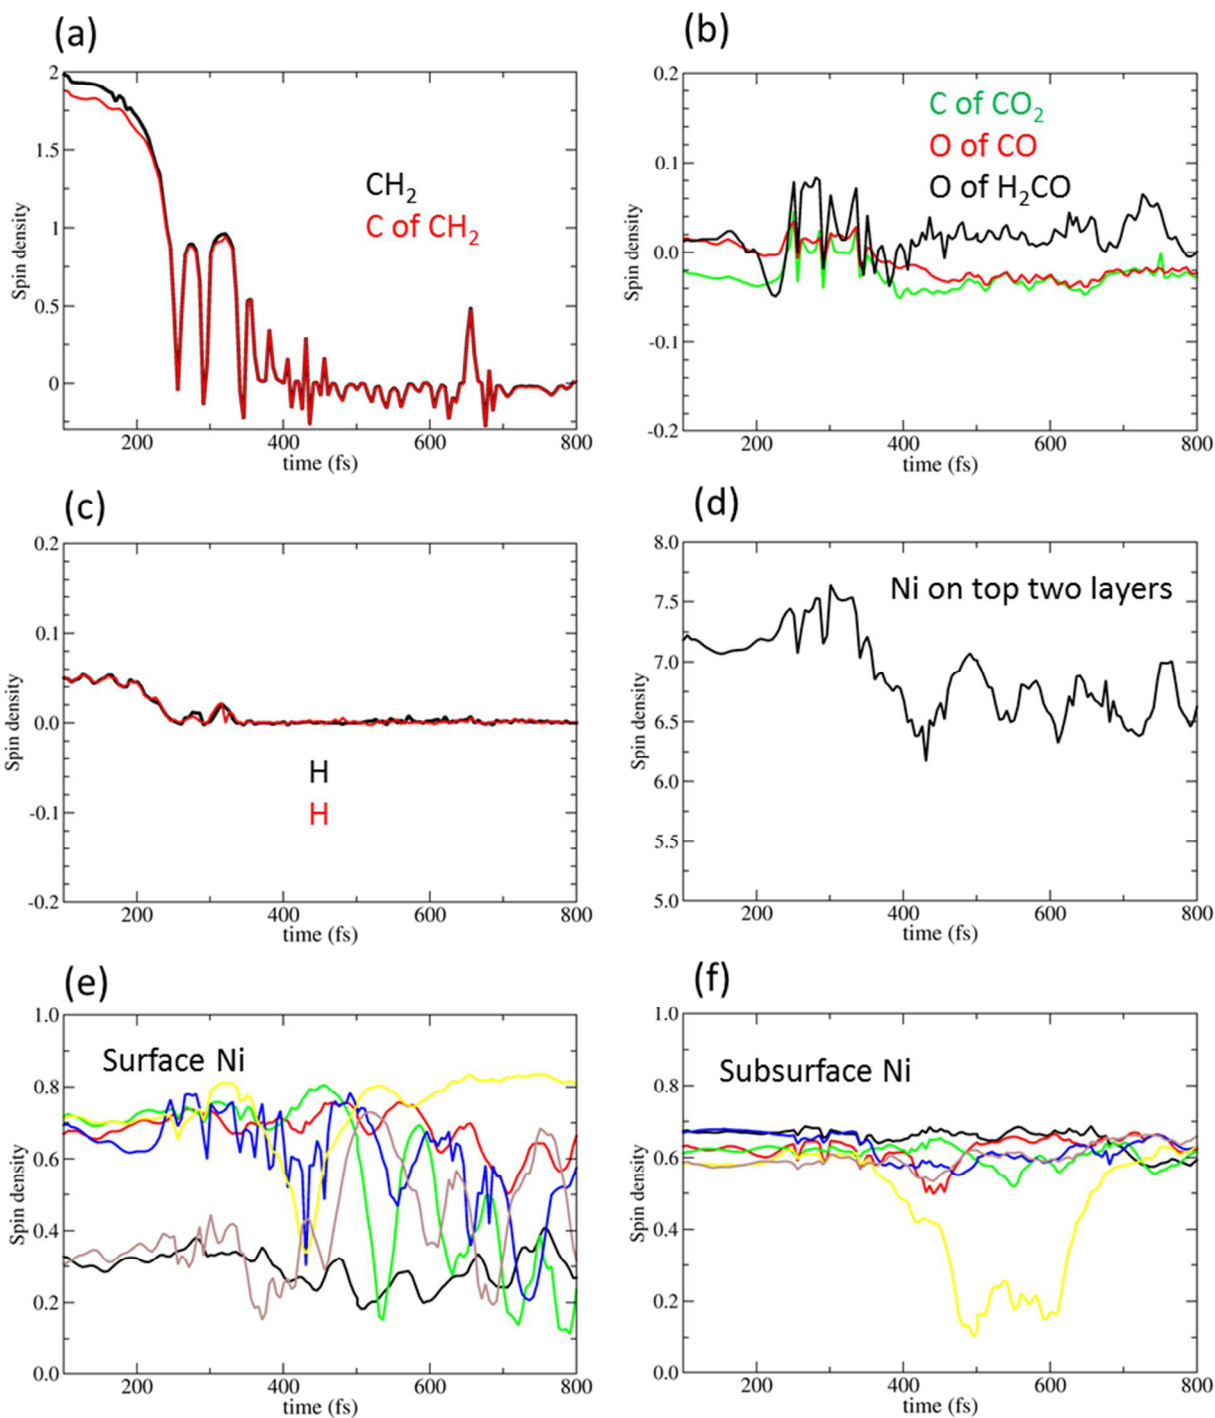

**Figure S2.** Evolution of spin densities for a trajectory which corresponds to the  $\text{CH}_2 + \text{CO}_2^* \rightarrow \text{H}_2\text{CO}^* + \text{CO}^*$  (Reaction 1 in Section 3.2 of the manuscript). Spin densities of (a)  $\text{CH}_2$  and carbon in  $\text{CH}_2$ ; (b) carbon of  $\text{CO}_2$  and two oxygen atoms; (c) hydrogen atoms; (d) Ni on top two layers; (e) six surface Ni atoms; and (f) six subsurface Ni atoms.

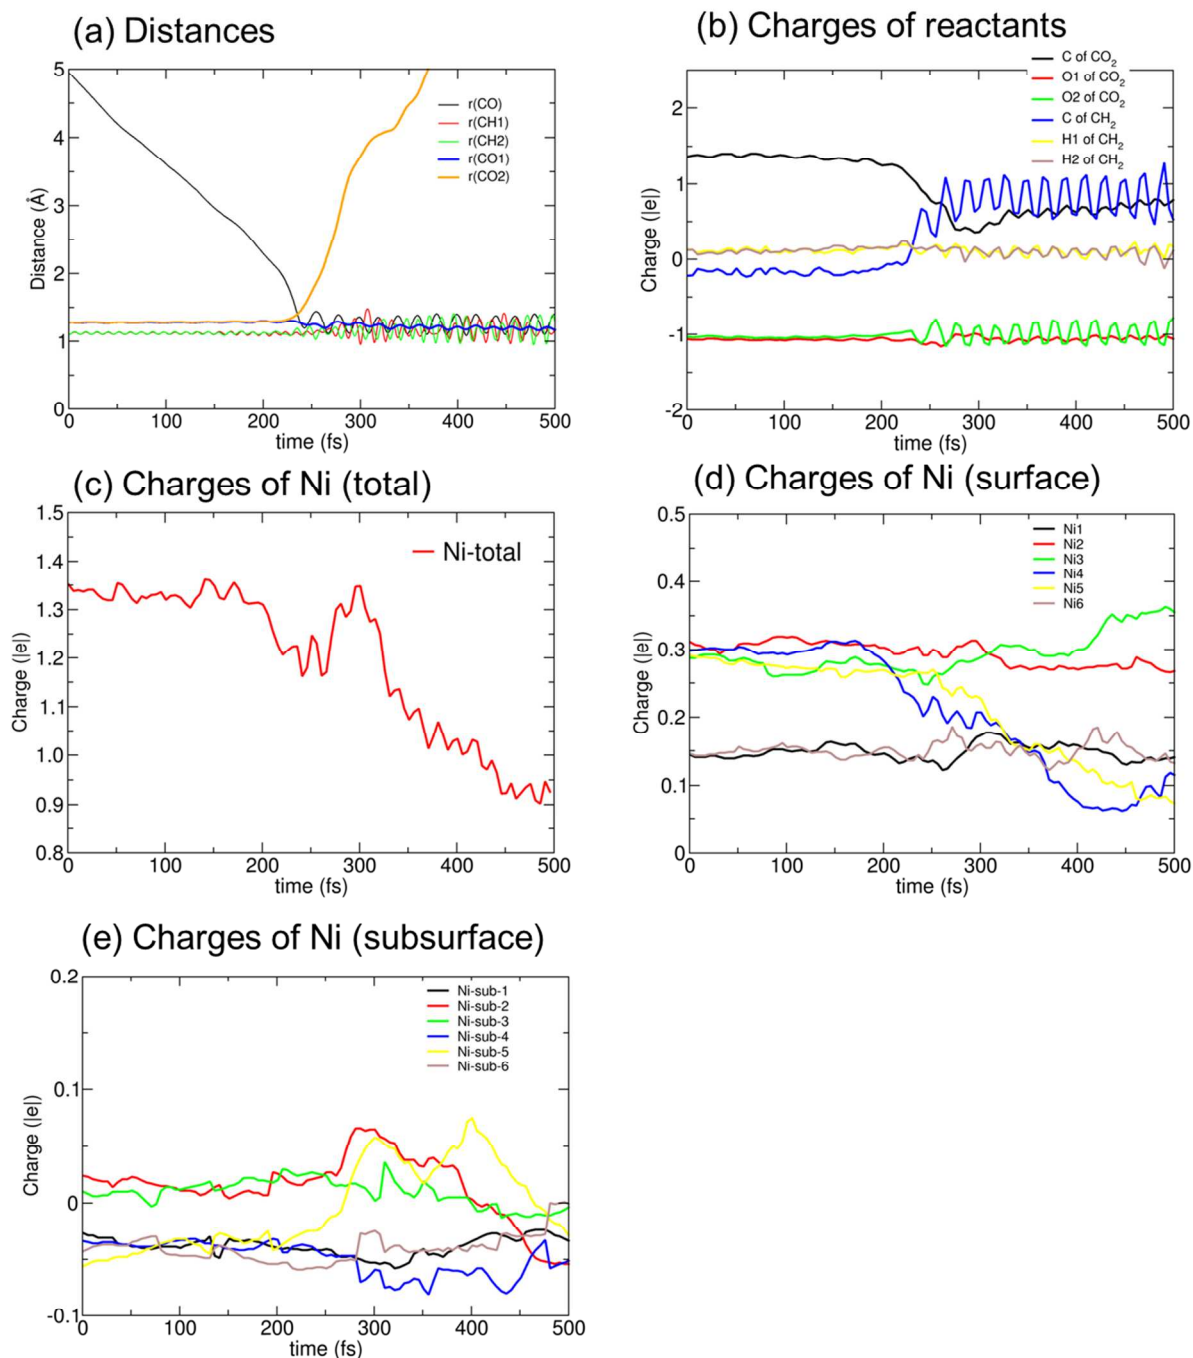

**Figure S3.** (a) Bond distances and atomic Bader charges of (b) reactants, (c) total Ni atoms, (d) surface Ni atoms, and (e) subsurface Ni atoms for a trajectory which corresponds to the  $\text{CH}_2 + \text{CO}_2^* \rightarrow \text{H}_2\text{CO (gas)} + \text{CO}^*$  with ER mechanism.

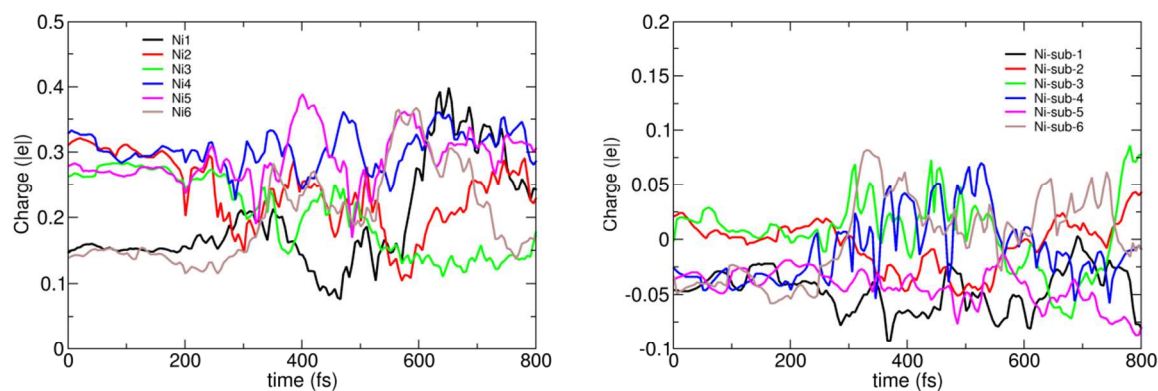

**Figure S4.** Atomic Bader charges of **surface (left)** and **subsurface (right)** Ni for a trajectory which corresponds to the  $\text{CH}_2 + \text{CO}_2^* \rightarrow 2\text{H}^* + 2\text{CO}^*$  reaction.

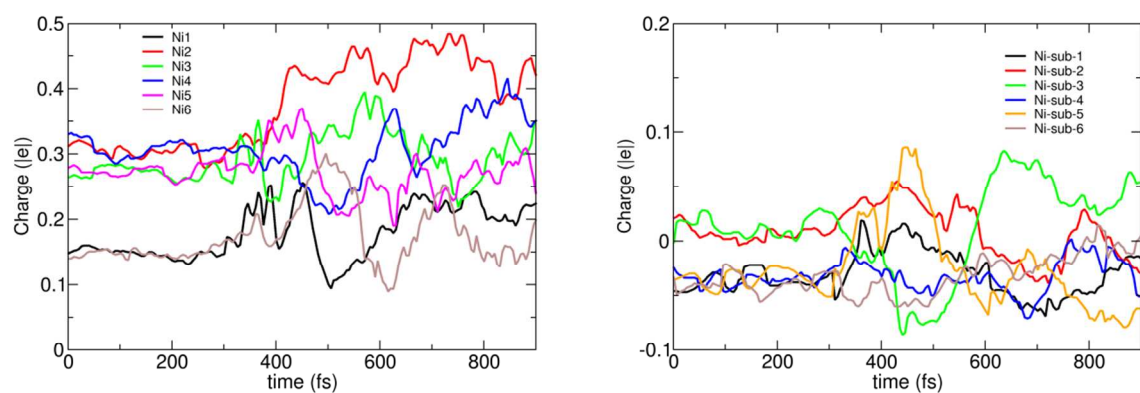

**Figure S5.** Atomic Bader charges of **surface (left)** and **subsurface (right)** Ni for a trajectory which corresponds to the  $\text{CH}_2 + \text{CO}_2^* \rightarrow \text{H}_2\text{C-CO}_2^*$  reaction.

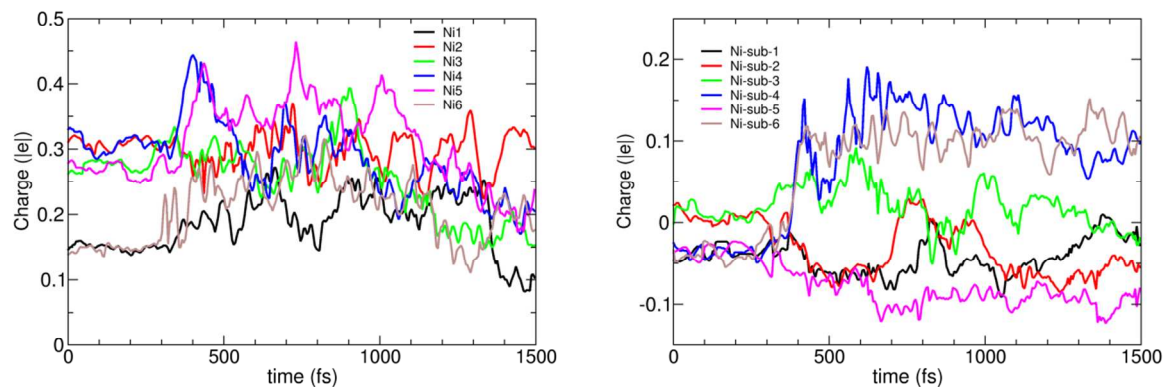

**Figure S6.** Atomic Bader charges of **surface (left)** and **subsurface (right)** Ni for a trajectory which corresponds to the  $\text{CH}_2 + \text{CO}_2^* \rightarrow \text{H}^* + \text{CH}^* + \text{CO}_2$  reaction.

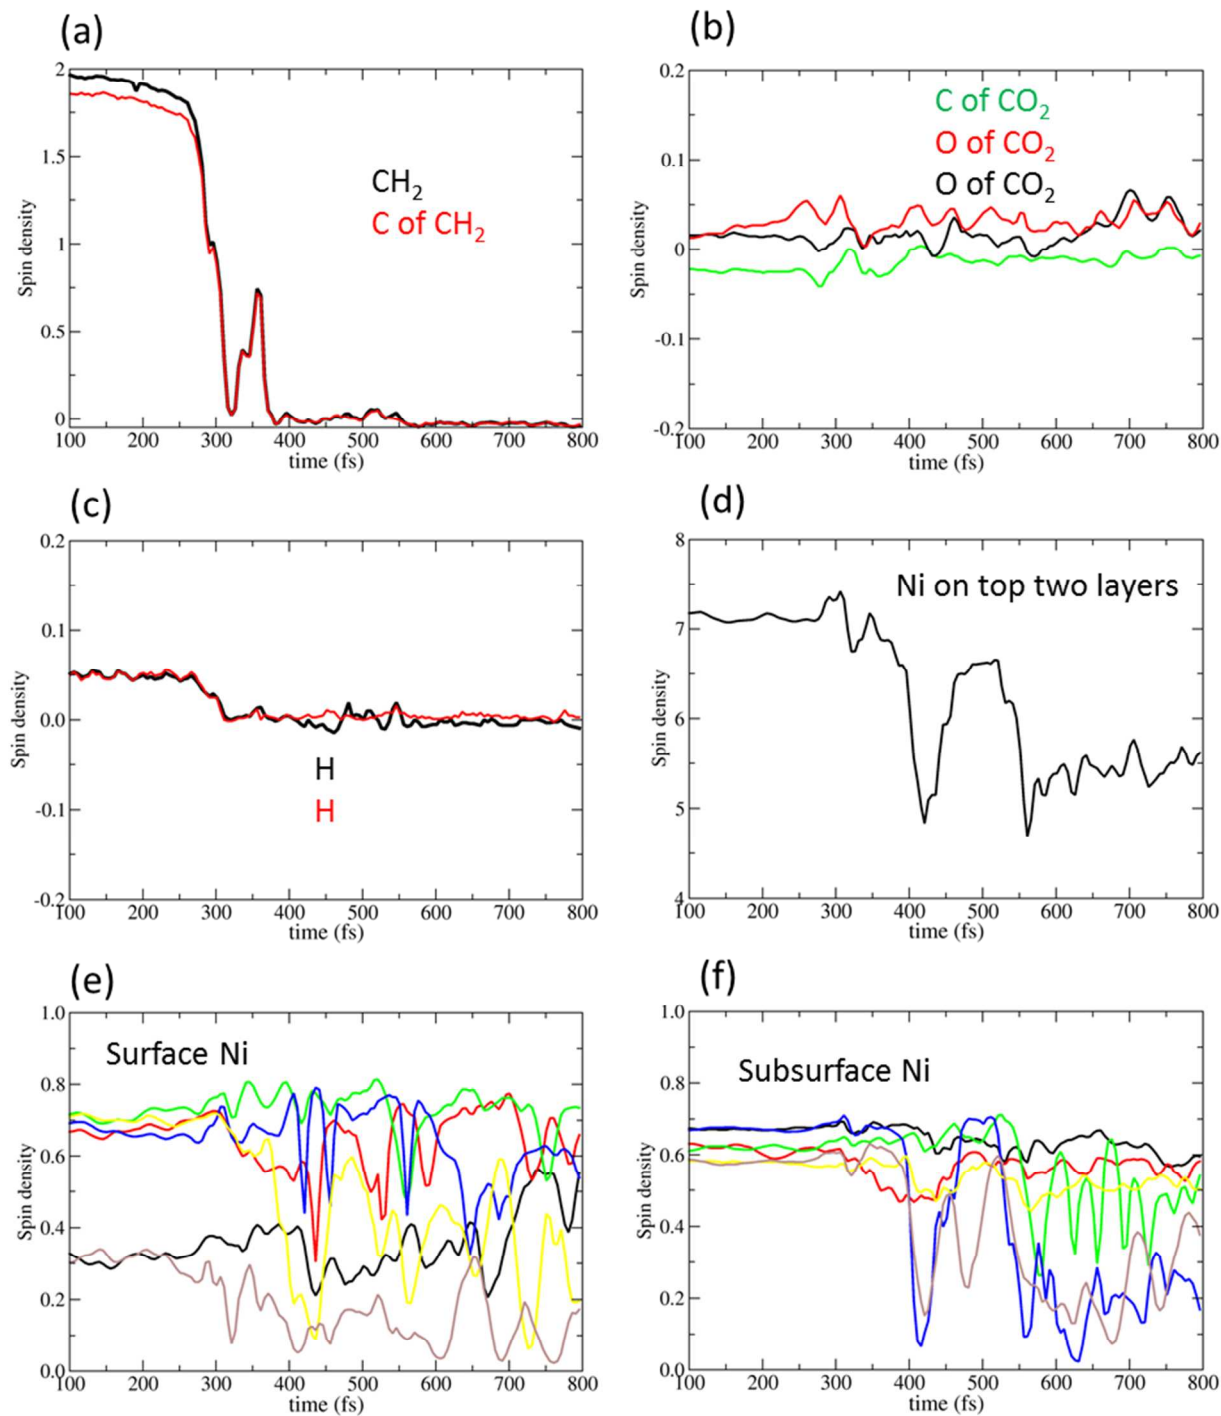

**Figure S7.** Evolution of spin densities for a trajectory which corresponds to the  $\text{CH}_2 + \text{CO}_2^* \rightarrow \text{H}^* + \text{CH}^* + \text{CO}_2$  (gas) (Reaction 4 in Section 3.2 of the manuscript). Spin densities of (a) CH<sub>2</sub> and carbon in CH<sub>2</sub>; (b) carbon of CO<sub>2</sub> and two oxygen atoms; (c) hydrogen atoms; (d) Ni on top two layers; (e) six surface Ni atoms; and (f) six subsurface Ni atoms.
